1 **Title:**

2 **SNP-level  $F_{ST}$  outperforms window statistics for detecting soft sweeps in local adaptation**

3

4 **Authors and affiliations:**

5 Tiago da Silva Ribeiro<sup>1,2,@</sup>, José A. Galván<sup>3</sup>, John E. Pool<sup>1,2,@</sup>

6 <sup>1</sup>Department of Integrative Biology, University of Wisconsin-Madison, Madison, WI, 53706, USA

7 <sup>2</sup>Laboratory of Genetics, University of Wisconsin-Madison, Madison, WI, 53706, USA

8 <sup>3</sup>John Jay College of Criminal Justice, New York, NY, 10019, USA

9

10 @ Corresponding authors:

11 Tiago da Silva Ribeiro, [tribeiro@wisc.edu](mailto:tribeiro@wisc.edu)

12 John E. Pool, [jpool@wisc.edu](mailto:jpool@wisc.edu)

13

14 **Abstract**

15 Local adaptation can lead to elevated genetic differentiation at the targeted genetic variant and  
16 nearby sites. Selective sweeps come in different forms, and depending on the initial and final  
17 frequencies of a favored variant, very different patterns of genetic variation may be produced.  
18 If local selection favors an existing variant that had already recombined onto multiple genetic  
19 backgrounds, then the width of elevated genetic differentiation (high  $F_{ST}$ ) may be too narrow to  
20 detect using a typical windowed genome scan, even if the targeted variant becomes highly  
21 differentiated. We therefore used a simulation approach to investigate the power of SNP-level  
22  $F_{ST}$  (specifically, the maximum SNP  $F_{ST}$  value within a window) to detect diverse scenarios of  
23 local adaptation, and compared it against whole-window  $F_{ST}$  and the Comparative Haplotype  
24 Identity statistic. We found that SNP  $F_{ST}$  had superior power to detect complete or mostly  
25 complete soft sweeps, but lesser power than window-wide statistics to detect partial hard  
26 sweeps. To investigate the relative enrichment and nature of SNP  $F_{ST}$  outliers from real data, we  
27 applied the two  $F_{ST}$  statistics to a panel of *Drosophila melanogaster* populations. We found that  
28 SNP  $F_{ST}$  had a genome-wide enrichment of outliers compared to demographic expectations, and  
29 though it yielded a lesser enrichment than window  $F_{ST}$ , it detected mostly unique outlier genes  
30 and functional categories. Our results suggest that SNP  $F_{ST}$  is highly complementary to typical  
31 window-based approaches for detecting local adaptation, and merits inclusion in future genome  
32 scans and methodologies.

33

34 **Key words**

35 Local adaptation, soft sweeps, partial sweeps, population genomics, *Drosophila melanogaster*

36

37 **Significance statement**

38 Studies that use genetic variation to search for genes evolving under population-specific natural  
39 selection tend to analyze data at the level of genomic windows that may each contain hundreds  
40 of variable sites. However, some models of natural selection (*e.g.* favoring an existing genetic  
41 variant) may result in genetic signals of local adaptation that are too narrow to be detected by  
42 such approaches. Here we use both simulations and empirical data analysis to show that  
43 searching for a site-specific signal of elevated genetic differentiation can find instances of local  
44 adaptation that other approaches miss, and therefore the integration of this signal into future  
45 studies may significantly improve our understanding of adaptive evolution and its genetic  
46 targets.

47

## 48 **Introduction**

49 Geographically distinct populations are exposed to different selective pressures, which may  
50 result in local adaptation. The detection of genomic regions under positive selection specific to  
51 one population is essential to uncovering the genetic basis of locally adaptive trait variation.  
52 Local adaptation can exist between populations with low genome-wide genetic differentiation,  
53 and comparing genetic variation between these closely-related populations can allow for much  
54 more powerful detection of positive selection than is possible from a single population. In light  
55 of that advantage, as well as the potential applicability of genetic mapping and functional  
56 approaches to locally adaptive traits, local adaptation has played a key role in our increasing  
57 understanding of adaptive evolution at the genetic level (Kawecki and Ebert 2004; Yeaman  
58 2015; Tigano and Friesen 2016). In addition to its importance for evolutionary biology and  
59 ecology, the identification of regions under selection has implications for applied fields such as  
60 health sciences and agriculture because it can also pinpoint regions of the genome that hold  
61 functional diversity (Bamshad and Wooding 2003; Ross-Ibarra *et al.* 2007). There has also been  
62 increasing recognition of the importance of local adaptation for a species' future adaptive  
63 potential, with implications for conservation genetics and adaptation to climate change (Funk *et*  
64 *al.* 2012; Aitken and Whitlock 2013; Fitzpatrick and Keller 2015).

65         Population genomic scans for local adaptation compare genetic variation between two  
66 populations, often searching for specific genomic windows that depart from genome-wide  
67 patterns of differentiation in a manner consistent with population-specific natural selection.  
68 Positive selection has traditionally been conceptualized and modeled as a selective sweep,

69 which traditionally involves a new beneficial mutation rising to fixation, with strong effects on  
70 genetic variation at linked sites (Maynard Smith and Haigh 1974; Kaplan *et al.* 1989). However,  
71 there are different kinds of selective sweeps, depending on the initial and final frequencies of  
72 the favored variant, and different statistical tests for deviations from neutrality vary in their  
73 power to detect them.

74 First, selective sweeps can be classified as hard or soft sweeps. In a hard sweep, only a  
75 single original haplotype carrying the advantageous allele is boosted by natural selection. This  
76 situation might be expected if selection favors either a newly occurring mutation or else a  
77 variant at low enough frequency that only one copy contributes to the sweep by chance. In a  
78 soft sweep, two or more distinct haplotypes carrying the beneficial variant increase in  
79 frequency. In some cases, soft sweeps occur because the advantageous allele was present in  
80 the population, segregating neutrally, prior to the onset of selection (Hermisson and Pennings  
81 2005). But they can also be the result of recurrent mutations or influx of new alleles through  
82 migration (Pennings and Hermisson 2006a, 2006b).

83 Selective sweeps can also be classified as complete or partial sweeps. In a complete  
84 sweep, the advantageous allele reaches fixation in the population. In a partial sweep, the  
85 advantageous allele is at an intermediary frequency. This may occur either because the sweep  
86 is still ongoing or because positive selection ended prior to fixation. Situations in which a sweep  
87 might terminate prematurely include an environmental change, a polygenic trait reaching its  
88 new optimum or threshold value, or an allele reaching a balanced equilibrium in a scenario such  
89 as heterozygote advantage.

90 Different kinds of selective sweeps leave different signatures of local adaptation and our  
91 power to detect them will differ depending on which methods we use (Lange and Pool 2016).  
92 Some common approaches to scanning the genome for population-specific selective sweeps use  
93  $F_{ST}$  (or  $F_{ST}$ -based) statistics to quantify genetic differentiation between populations. Local  
94 adaptation is expected to create genomic regions with higher differentiation than what would  
95 be expected under neutrality, since allele frequencies in these regions will change faster as the  
96 beneficial allele increases in frequency (Lewontin and Krakauer 1973). Neutral expectations can  
97 be inferred either with demographic simulations or an outlier approach. Demographic  
98 simulations, based on a previously estimated model of population history, can be used to mimic  
99 the history of the populations being studied in the absence of natural selection. Outlier  
100 approaches rely on the genome-wide distribution of  $F_{ST}$  as a proxy for the neutral distribution,  
101 since neutral forces (including those due to demographic history) can broadly be expected to  
102 affect the whole genome similarly. Genome scans for regions under selection have typically  
103 focused on measuring  $F_{ST}$  or other statistics in windows of the genome of some predefined size  
104 to search for highly differentiated genomic regions.

105 A motivating empirical example for the present study comes from an investigation of the  
106 genetic basis of locally adaptive melanism in high altitude *Drosophila melanogaster* populations.  
107 Here, the authors used QTL mapping to identify genomic regions associated with derived dark  
108 pigmentation traits, and then used  $F_{ST}$  to scan these regions for signatures of selection (Bastide  
109 *et al.* 2016). One very narrow and strong QTL for highland Ethiopian melanism contained the  
110 well-known pigmentation gene *ebony*, which also contributed to melanic evolution in a Uganda

111 population (Pool and Aquadro 2007; Rebeiz *et al.* 2009). Assessing genetic differentiation  
112 between the Ethiopia and Zambia populations for the window containing *ebony*, although  
113 window-wide  $F_{ST}$  was only marginally elevated, it had a SNP with extremely high  $F_{ST}$  (0.85).  
114 Compared to demographic simulations, this window's maximum SNP  $F_{ST}$  value was among the  
115 top 1% of all windows, while its window-wide  $F_{ST}$  was only among the 7% highest (Bastide *et al.*  
116 2016). Simulated scenarios of soft sweeps from standing variation replicated this pattern of  
117 extremely high SNP  $F_{ST}$  and only moderately high window  $F_{ST}$ , suggesting that some kinds of  
118 selective sweeps that may not be detected using window-wide  $F_{ST}$  could potentially be detected  
119 with a SNP-level  $F_{ST}$  approach. Further potential support for the use of SNP  $F_{ST}$  to detect  
120 adaptive events in this same species is demonstrated by much stronger parallel signatures of  
121 selection seen at the SNP level compared to the window level in populations that independently  
122 adapted to cold environments (Pool *et al.* 2017).

123         Challenges of using SNP  $F_{ST}$  values include their variability due to random sampling  
124 effects (Weir *et al.* 2005) and the large number of tests that need to be made against a null  
125 distribution. Therefore, larger sample sizes are needed than for window  $F_{ST}$ . By using only the  
126 highest SNP  $F_{ST}$  value within a window, and comparing against null simulations with demography  
127 and recombination, we may somewhat improve the multiple testing issue, since here we are not  
128 treating all tightly linked SNPs as fully independent tests. Another advantage of this approach is  
129 to make a SNP  $F_{ST}$  genome scan easier to compare to window-wide statistics. If these metrics  
130 are able to detect different types of selective events, then a more comprehensive scan for  
131 signatures of selection could benefit from using both window and SNP-based methods. The

132 genome-wide distribution of these statistics in natural populations, compared to their neutral  
133 expectations, might also shed light on the contribution of different kinds of selective sweeps to  
134 local adaptation.

135 To understand the utility of using the highest  $F_{ST}$  value of any SNP within a window  
136 (herein  $F_{ST\_MaxSNP}$ ) as a local adaptation summary statistic, we performed power analyses based  
137 on extensive simulations, and then applied these results to empirical data from natural  
138 populations of *D. melanogaster*. We calculated the power of  $F_{ST\_MaxSNP}$  to detect signatures of  
139 local adaptation under a wide range of different selective scenarios and demographic histories.  
140 We performed demographic simulations and compared the power of  $F_{ST\_MaxSNP}$  to both window-  
141 wide  $F_{ST}$  (herein,  $F_{ST\_Window}$ ) and a comparative haplotype-based statistic ( $\chi_{MD}$ ). Then, we  
142 investigated the genome-wide distribution of  $F_{ST\_MaxSNP}$  and  $F_{ST\_Window}$  among several natural  
143 populations of *D. melanogaster*, to determine whether either statistic was enriched genome-  
144 wide in empirical data compared to neutral expectations. Finally, we used an outlier approach  
145 to perform a genome scan for regions potentially under local adaptation between the Ethiopia  
146 and Zambia populations mentioned above, using  $F_{ST\_MaxSNP}$ ,  $F_{ST\_Window}$ , and  $\chi_{MD}$ , and we  
147 determined the extent of overlap between candidate regions identified according to these  
148 different methods. These analyses allowed us to both identify the parameter space in which  
149  $F_{ST\_MaxSNP}$  outperforms other statistics, and to assess the utility and complementarity of applying  
150 these approaches to real data.

151

152



153 **Results**

154 **SNP-level  $F_{ST}$  and window-wide summaries have complementary power to detect local**

155 **adaptation**

156 We performed power analyses of  $F_{ST\_MaxSNP}$ ,  $F_{ST\_Window}$ , and  $\chi_{MD}$  using population genetic  
157 simulations with and without natural selection. We used *msms* (Ewing and Hermisson 2010) to  
158 simulate population-specific selective sweeps with constrained initial and final allele  
159 frequencies, as well as scenarios with population size bottlenecks or migration (simulation  
160 commands in Table S1). For each scenario, we simulated populations with high effective  
161 population size ( $N_e$ ) using a set of parameters based on *D. melanogaster* and populations with  
162 low  $N_e$  using parameters based on humans, following the design of a previous power analysis  
163 study that did not include  $F_{ST\_MaxSNP}$  (Lange and Pool 2016). Power was defined in a locus-  
164 specific context, based on the proportion of selection simulations giving a more extreme value  
165 of the summary statistic than the 95th quantile of its distribution from neutral simulations.

166 Unsurprisingly, all three statistics were found to have high power for the case of  
167 complete hard sweeps (Figure 1; Table S1). These simulations were conditioned on fixation of a  
168 beneficial new mutation in one population that had not occurred in the other population. In  
169 light of this fixed difference,  $F_{ST\_MaxSNP}$  in all replicates had its maximum value ( $F_{ST\_MaxSNP} = 1$ ). In  
170 such cases, the power of  $F_{ST\_MaxSNP}$  was binary, either zero or one, depending on whether or not  
171 5% of the corresponding neutral replicates had an allele that reached fixation. In our simple  
172 isolation model, the likelihood that a neutral allele can reach fixation increases with the split  
173 time (Table S1; Figure S1). Stronger bottlenecks also boost the likelihood of having neutral

174 alleles reach fixation (Table S1; Figure S2, Figure S3). Hence, power for  $F_{ST\_MaxSNP}$  to detect  
175 complete hard sweeps goes from high, for recent splits and weaker bottlenecks, to zero for  
176 histories in which more than 5% of neutral replicates contain a fixed difference. Similarly,  
177  $F_{ST\_Window}$  and  $\chi_{MD}$  had higher power to detect signatures of local adaptation following recent  
178 splits and in weaker bottlenecks, but their change in power was gradual and continuous instead  
179 of binary.

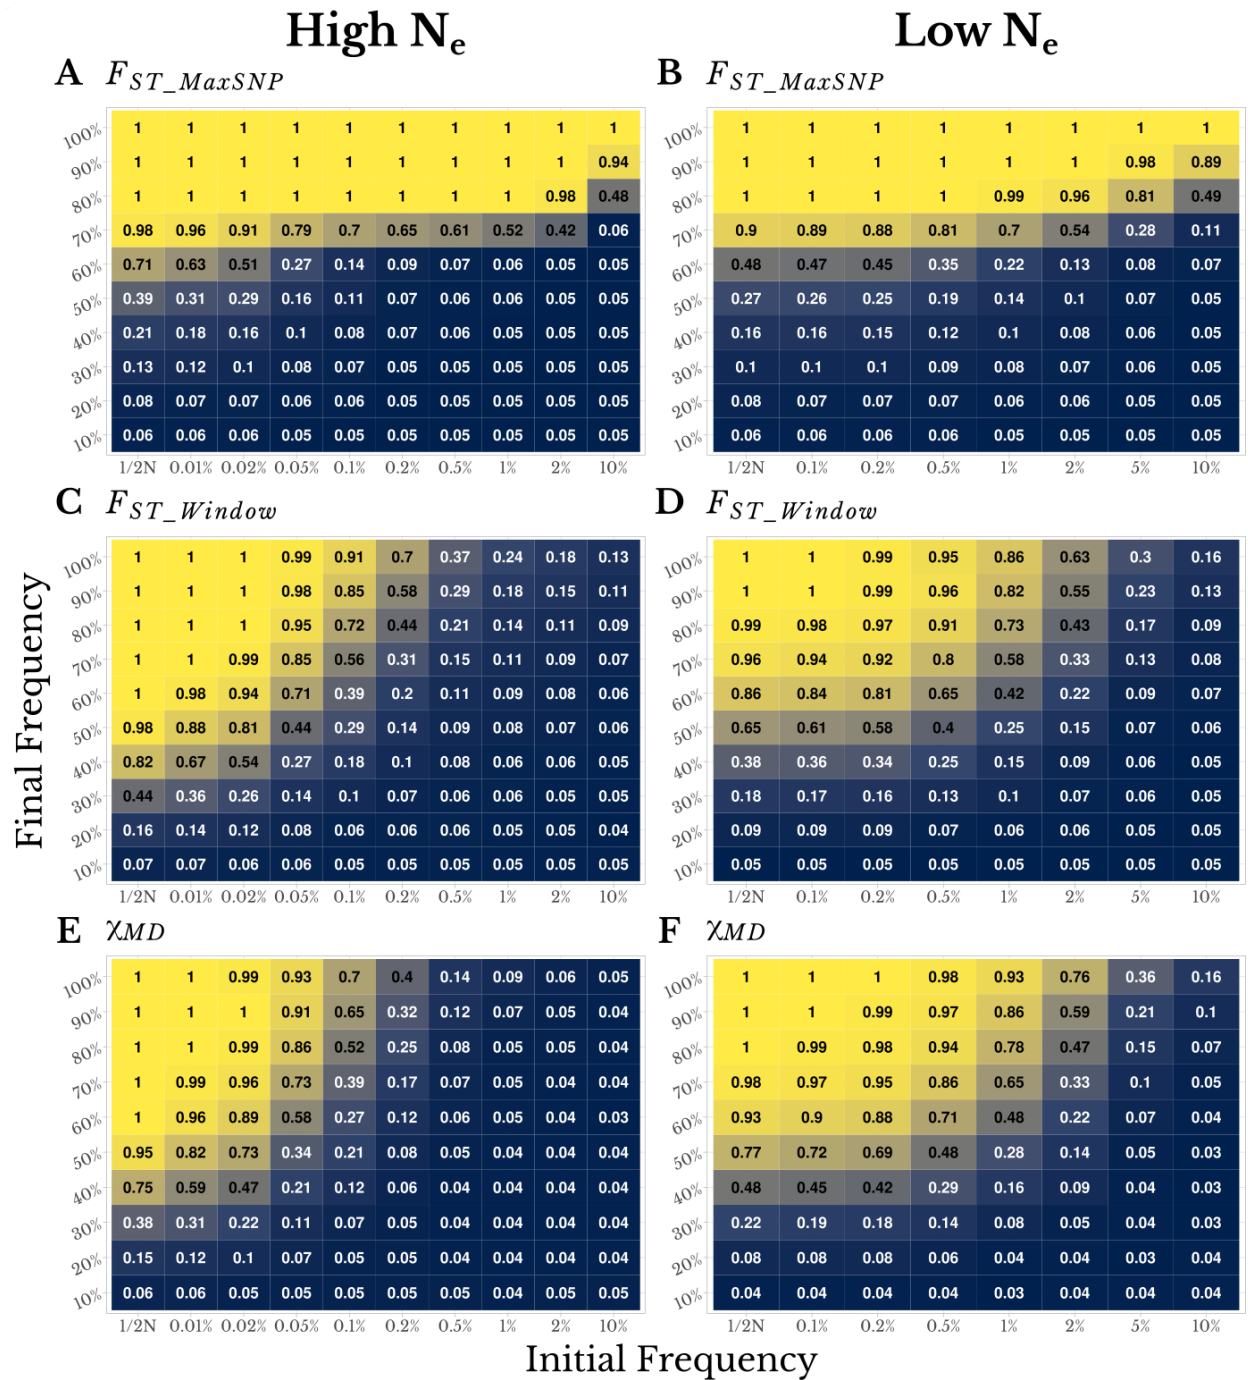

180  
 181 **Figure 1.** SNP-level  $F_{ST}$  and window-wide statistics show complementary power to detect local  
 182 adaptation, depending on the type of selective sweep simulated. Numbers and colors in each  
 183 panel both depict statistical power to detect local adaptation, in high  $N_e$  populations ( $s=0.001$ ,

184 left column) and low  $N_e$  populations ( $s=0.01$ , right column). In each panel, the x-axis illustrates  
185 the pre-selection frequency of a favored variant (with the left column indicating selection on  
186 newly-occurring mutations) and the y-axis illustrates the final frequency of the sweep (with the  
187 top row showing complete sweeps). Detection power is shown for (A and D)  $F_{ST\_MaxSNP}$ , (B and E)  
188  $F_{ST\_Window}$ , and (C and F)  $\chi_{MD}$ . These results are based on a demographic history of simple  
189 isolation between two populations without change in population size, with a split time of  $0.2N_e$   
190 generations.

191  
192 In the case of complete or nearly complete soft sweeps,  $F_{ST\_MaxSNP}$  showed a clear power  
193 advantage over  $F_{ST\_Window}$  and  $\chi_{MD}$ . Notably, for sweeps ending between 80% and 100%  
194 frequency,  $F_{ST\_MaxSNP}$  had high power to detect local adaptation, even for cases with rather high  
195 initial frequencies of the beneficial allele (e.g. 10%; Figure 1; Figure 2). In contrast,  $F_{ST\_Window}$  and  
196  $\chi_{MD}$  showed rapidly diminishing performance as sweeps became softer (Figure 1; Figure 2).  
197 These results make sense, in that beneficial alleles that drift to higher pre-selection frequencies  
198 have more time to recombine onto multiple haplotypes, and recombination events will have  
199 happened closer to the selected site on average. Therefore, soft sweeps are generally narrower  
200 in width and may not substantially alter window-wide statistics (Catania *et al.* 2004; Schlenke  
201 and Begun 2004; Hermisson and Pennings 2005). Although the two window-wide statistics  
202 maintained good power for lower initial frequencies, some of the replicates of those scenarios  
203 are actually generating hard sweeps due to the chance survival of a single haplotype carrying  
204 the favored variant (Jensen 2014), as shown by an average number of beneficial haplotypes

205 lower than two in these simulations (Figure 2). Moreover, as the average number of haplotypes  
 206 carrying the favored variant increased, the power of the window-wide statistics decreased  
 207 (Figure 2), while the power of  $F_{ST\_MaxSNP}$  was unchanged.  
 208

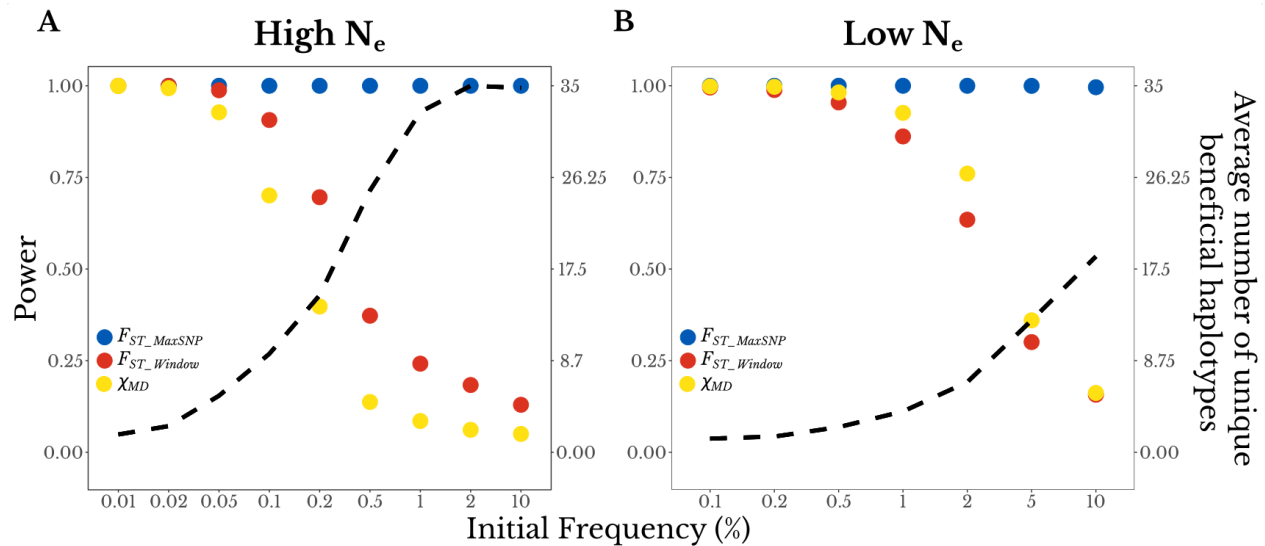

209  
 210 **Figure 2.**  $F_{ST\_MaxSNP}$  shows an increasing power advantage as sweeps become softer. For  
 211 complete sweeps with a range of initial frequencies (x-axis), the two y-axes show detection  
 212 power for each statistic (left axis, dots) and the average number of unique beneficial haplotypes  
 213 present at the end of the simulation (right axis, dashed line). Results are shown for (A) high  $N_e$   
 214 populations ( $s=0.001$ ) and (B) low  $N_e$  populations ( $s=0.01$ ), for the same demographic history as  
 215 in Figure 1.

216  
 217 Contrasting results were obtained for partial, harder sweep scenarios. In cases where  
 218 new mutations or rare standing variants were only boosted to intermediate frequencies,  
 219  $F_{ST\_Window}$  and  $\chi_{MD}$  had fairly strong power, whereas  $F_{ST\_MaxSNP}$  declined sharply in effectiveness at

220 around 60% final frequency for hard sweeps (Figure 1). These results are also intuitive, in that  
221 partial hard sweeps can meaningfully alter allele frequencies across a whole window and  
222 generate a class of identical haplotypes, even though no single SNP traverses an extreme range  
223 of frequencies. The broadly similar power profiles of  $F_{ST\_Window}$  and  $\chi_{MD}$  are somewhat surprising  
224 in light of their distinct basis (albeit consistent with Lange and Pool, 2016). Less surprising is  
225 that for the challenging scenario of partial soft sweeps, none of the three statistics showed  
226 strong power in the scenarios examined (Figure 1).

227         Whereas the above simulations had no migration, we also wondered if  $F_{ST\_MaxSNP}$  might  
228 prove useful in detecting targets of local adaptation for which genetic differentiation had been  
229 whittled down in width by recombination with migrant alleles over time. We therefore  
230 simulated scenarios with varying combinations of migration rate and population split time, while  
231 assuming symmetric migration rates and equal but opposing selective pressures. Overall,  
232  $F_{ST\_MaxSNP}$  and  $F_{ST\_Window}$  performed very similarly to each other and better than  $\chi_{MD}$ . Particularly  
233 in the high  $N_e$  scenarios (which feature a higher ratio of recombination to mutation events) with  
234 intermediate migration rates, there was a narrow space of parameters in which  $F_{ST\_MaxSNP}$   
235 performed slightly better than  $F_{ST\_Window}$  (Figure S4). The split time between the populations  
236 greatly affected the power of  $\chi_{MD}$ , which performed better on recent splits. The power of the  
237  $F_{ST}$  statistics showed a small improvement for more recent splits and intermediate migration  
238 rates. Although small, the effect of split time also seemed more pronounced on  $F_{ST\_Window}$  than  
239  $F_{ST\_MaxSNP}$  (Figure S4). Overall, these analyses provide only modest support for the notion that

240  $F_{ST\_MaxSNP}$  could help detect peaks of genetic differentiation driven by local adaptation that have  
241 been narrowed by migration and recombination.

242 In the above simulations, we used a sample size of 50 chromosomes per population. We  
243 generally expect statistical power to be correlated with sample size and understanding the  
244 effect of sample size on the power of each statistic is relevant when designing an experiment or  
245 choosing which statistics to use. We analyzed the power of  $F_{ST\_MaxSNP}$ ,  $F_{ST\_Window}$ , and  $\chi_{MD}$  in  
246 three scenarios for high  $N_e$  and three for low  $N_e$ . We chose scenarios in which  $F_{ST\_MaxSNP}$  and the  
247 window wide statistics performed differently: a mostly complete soft sweep, a complete soft  
248 sweep with a bottleneck, and a partial hard sweep. We found that sample size had a stronger  
249 effect on  $F_{ST\_MaxSNP}$  than on the window wide statistics (Figure 3).  $F_{ST\_MaxSNP}$  is based on allele  
250 frequencies at a single site, so it is more sensitive to the increased sampling variance at lower  
251 sample sizes than window wide statistics. The sampling variance in each SNP in a window  
252 should fluctuate around the mean, so when information from each SNP is combined the  
253 window-wide statistic suffers less from the reduced sample size. Demographic history also  
254 affected the effect of sample size on each statistic: in scenarios with a population bottleneck,  
255 which also increases sampling variance, the power of  $F_{ST\_MaxSNP}$  changed from near 1 at sample  
256 size 50 or higher to 0 at sample sizes smaller than 50 (Figure 3C, 3D). More generally,  $F_{ST\_MaxSNP}$   
257 was found to perform much better with 50 chromosomes than with 20, but showed relatively  
258 less improvement for sample sizes larger than 50.

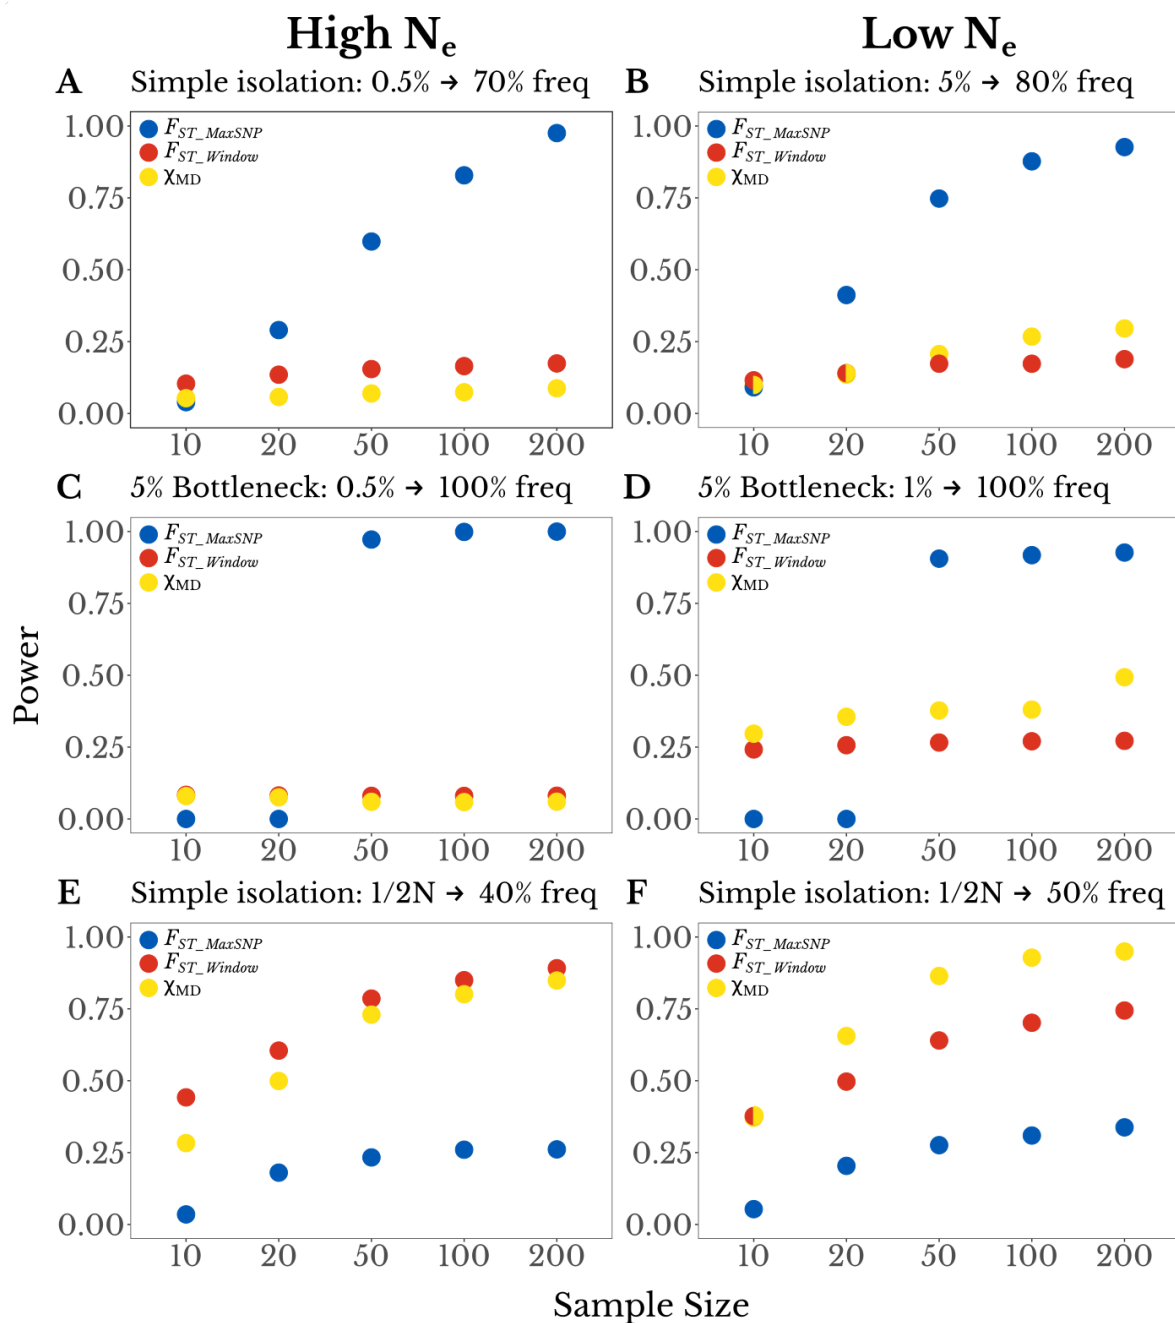

259

260 **Figure 3.** The power of  $F_{ST\_MaxSNP}$  is particularly sensitive to sample size. Here, the power of

261 each statistic (y-axis) is plotted as a function of sample size (x-axis; number of chromosomes per

262 population). We found that depending on sample size,  $F_{ST\_MaxSNP}$  outperforms  $F_{ST\_Window}$  and  $\chi_{MD}$

263 for a simple isolation model, for: (A) a high  $N_e$  population with initial beneficial allele frequency



264 of 0.005 and final frequency of 0.70, and (B) a low  $N_e$  population with initial frequency 0.05 and  
265 final frequency of 0.80. Similar results were observed for a complete soft sweep with a  
266 population bottleneck of 0.05, except that the loss of power for  $F_{ST\_MaxSNP}$  was more immediate  
267 at lower sample sizes, for: (C) a high  $N_e$  population with initial frequency 0.05, (D) a low  $N_e$   
268 population with initial frequency 0.01. For partial hard sweep scenarios where  $F_{ST\_Window}$  and  $\chi_{MD}$   
269 outperform  $F_{ST\_MaxSNP}$ , all three statistics show more gradual sample size effects, specifically for  
270 new mutations and: (E) a final frequency of 0.40 in a high  $N_e$  population, and (F) a final  
271 frequency of 0.50 in a low  $N_e$  population.

272  
273 We also analyzed the effect of window size on the power of each statistic, with the aim  
274 of determining whether there would be a window size for which a single statistic would perform  
275 well in contrasting scenarios. For example, one might hope that  $F_{ST\_Window}$  for a narrower  
276 window might retain good performance for partial hard sweeps, while also capturing the  
277 advantages of  $F_{ST\_MaxSNP}$  for complete soft sweeps. We explored four scenarios of partial  
278 sweeps, two for the high  $N_e$  and two for the low  $N_e$ . For each population size, we chose one  
279 scenario in which the power of  $F_{ST\_MaxSNP}$  outperformed  $F_{ST\_Window}$  and  $\chi_{MD}$ , and one in which it  
280 underperformed. In practice, a reduction in window size would result in an increase in the  
281 number of tests performed in a genome scan. Therefore, we applied a Bonferroni correction to  
282 the p-value proportional to the reduction in size. Our results showed that, for the two scenarios  
283 in which  $F_{ST\_MaxSNP}$  outperformed  $F_{ST\_Window}$  and  $\chi_{MD}$ , the power of each statistic remained mostly  
284 constant (Figure 4). For the scenarios in which  $F_{ST\_Window}$  and  $\chi_{MD}$  had an advantage, the power

285 of each statistic, as well as the difference among them, declined with smaller window sizes.  
286 Overall, there was no window size in which a single statistic performed well for all scenarios,  
287 and hence it may be preferable to apply  $F_{ST\_MaxSNP}$  and window-wide statistics separately to  
288 empirical data.  
289

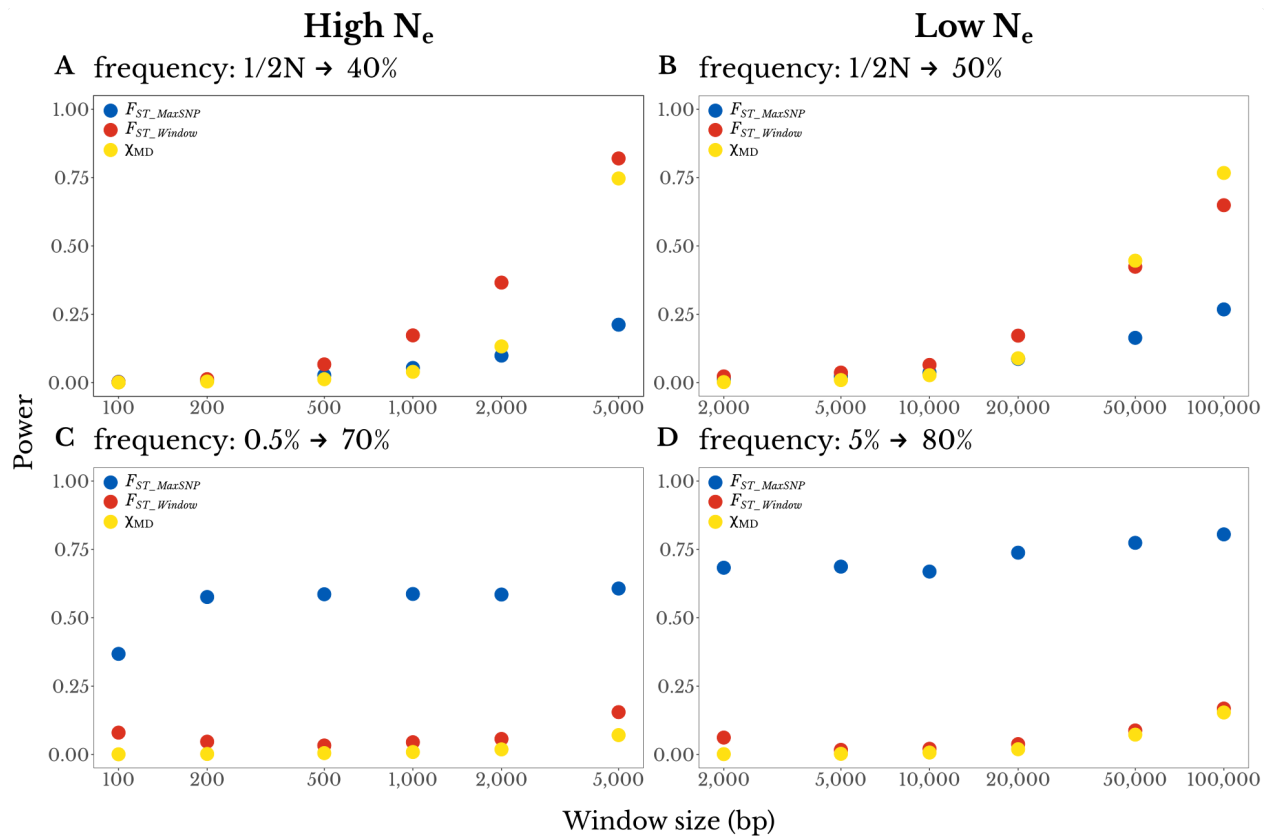

290  
291 **Figure 4.** Varying window size does not reveal a single statistic with broad detection power.  
292 The top panels show partial hard sweeps for which  $F_{ST\_Window}$  and  $\chi_{MD}$  outperform  $F_{ST\_MaxSNP}$ : (A)  
293 a high  $N_e$  population with a final beneficial allele frequency of 0.40, And (B) a low  $N_e$  population  
294 with a final frequency of 0.50. The bottom panels show mostly complete soft sweeps for which  
295  $F_{ST\_MaxSNP}$  outperforms  $F_{ST\_Window}$  and  $\chi_{MD}$ : (C) a high  $N_e$  population with an initial beneficial allele

296 frequency of 0.005 and final frequency of 0.70, and (D) a low  $N_e$  population with initial  
297 frequency 0.05 and final frequency 0.80. These power values reflect a Bonferroni-corrected  
298 significance threshold to reflect the relatively larger number of smaller windows needed.  
299 Results do not suggest that any statistic in a smaller window size captures the advantages of  
300 both  $F_{ST\_MaxSNP}$  and the window-wide statistics.

301

### 302 **Outliers for $F_{ST\_MaxSNP}$ and $F_{ST\_Window}$ are enriched in empirical data**

303 In light of the above results, we were interested in applying both  $F_{ST\_MaxSNP}$  and  $F_{ST\_Window}$  to an  
304 empirical data set, in part with an interest in quantifying the relative enrichment of outliers for  
305 each statistic, and what that might suggest about the modes of selection active in these  
306 populations. We chose to focus on data from the *Drosophila* Genome Nexus (Lack *et al.* 2015,  
307 2016), because it contained several populations of *D. melanogaster* that were linked by an  
308 estimated model of population history (Sprengelmeyer *et al.* 2020) and had at least minimal  
309 sample sizes available for studying genome-wide patterns of  $F_{ST}$  (Table S2). We included six  
310 natural populations of flies. From the ancestral range in Zambia, we included one town  
311 population (Siavonga) and one wilderness population (Kafue). We also included four additional  
312 town populations: from Rwanda, South Africa, Ethiopia, and France (the latter three having  
313 independently colonized colder environments; Pool *et al.* 2017).

314 We calculated a p-value for each empirical window in each pairwise population  
315 comparison, based on neutral distributions of  $F_{ST\_MaxSNP}$  or  $F_{ST\_Window}$  generated using coalescent  
316 simulations of the estimated demographic history (Sprengelmeyer *et al.* 2020; simulation

317 commands in Table S2). Under neutrality, a uniform distribution of p-values is expected. In  
318 general, for most population pairs, the distribution of p-values for  $F_{ST\_MaxSNP}$  and  $F_{ST\_Window}$   
319 showed a U-shape instead of an uniform distribution (e.g. Figure 5A). Nonetheless, the  
320 enrichment of high  $F_{ST}$  (defined as p-values from 0 to 0.05) and low  $F_{ST}$  (p-values from 0.95 to 1)  
321 varied for each statistic and across the population comparisons (Figure 5B-C).

**A** Ethiopia *vs.* Zambia – ChrX

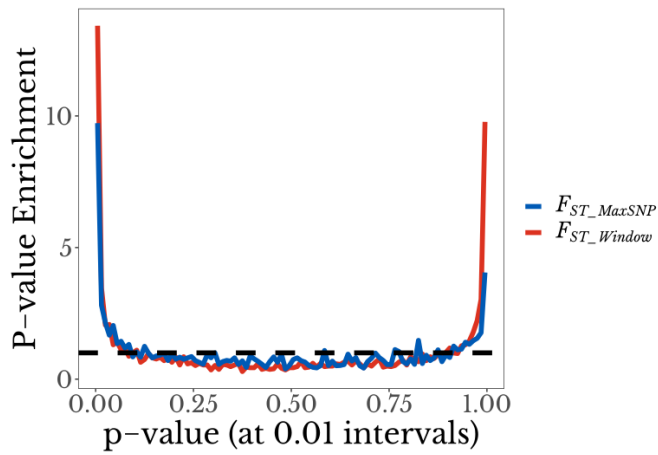

**B** Chromosome X  
 $F_{ST\_Window}$  - enrichment

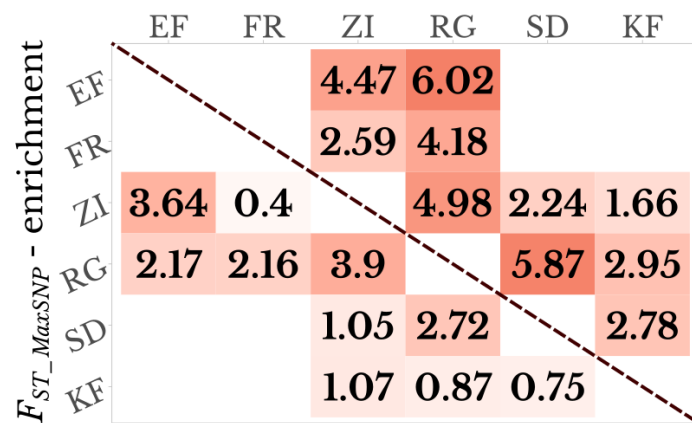

**C** Autosomes  
 $F_{ST\_Window}$  - enrichment

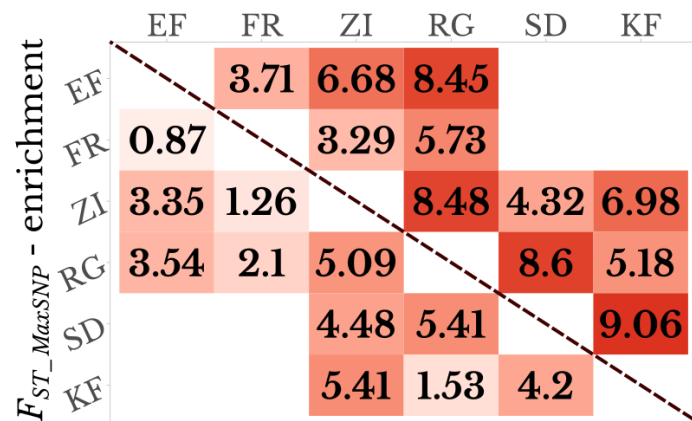

323 **Figure 5.**  $F_{ST\_MaxSNP}$  and  $F_{ST\_Window}$  both show outlier enrichment between natural populations of  
324 *D. melanogaster*. (A) Ethiopia-Zambia  $F_{ST\_MaxSNP}$  and  $F_{ST\_Window}$  values on chromosome X show  
325 enrichment of low (right) and especially high values (left), based on the distribution of p-values  
326 obtained from neutral demographic simulations. (B and C)  $F_{ST\_MaxSNP}$  (lower diagonal) and  
327  $F_{ST\_Window}$  (upper diagonal) both show enrichment of high outliers on (B) chromosome X and (C)  
328 combined autosome arms.  $F_{ST\_Window}$  shows a greater enrichment in nearly all cases.  
329 Populations: SD = South Africa. ZI = Zambia. KF = Kafue, Zambia. RG = Rwanda. EF = Ethiopia.  
330 Population pairs not present in the same demographic model were not evaluated. Color scale  
331 ranges from the minimum to maximum value within each panel.

332  
333 All population pair comparisons showed an enrichment for windows with high  $F_{ST\_Window}$ .  
334 The smallest enrichment was found between the Zambia (town) and France populations, for  
335 which there were 3.29 more windows with high  $F_{ST\_Window}$  than expected by chance. The highest  
336 enrichment was found in the comparison between the South Africa and Kafue (Zambia  
337 wilderness) populations, with an enrichment factor of 9.06. For  $F_{ST\_MaxSNP}$ , eight population pairs  
338 had an enrichment value  $> 2$ , the highest being 5.41 (between the Zambian town and wilderness  
339 populations, and between South Africa and Rwanda). On the other hand, one population pair  
340 was slightly depleted of windows with high  $F_{ST\_MaxSNP}$  (enrichment to 0.87 between France and  
341 Ethiopia). In most comparisons,  $F_{ST\_Window}$  showed higher enrichment than  $F_{ST\_MaxSNP}$ . The only  
342 exception was the comparison between South Africa and Zambia (town population), in which  
343 both enrichments were very similar:  $F_{ST\_MaxSNP}$  enrichment was 4.48 and  $F_{ST\_Window}$  enrichment

344 4.32 (Figure 5). This large variation in enrichment between populations suggests that the kind  
 345 and prevalence of selective sweeps unique to each population may vary among populations.

346 The almost universally greater enrichment of  $F_{ST\_Window}$  relative to  $F_{ST\_MaxSNP}$  could hint  
 347 that sweeps in the unique detection parameter space of  $F_{ST\_Window}$  (*i.e.* partial harder sweeps)  
 348 are more common among these populations than sweeps in the unique space of  $F_{ST\_MaxSNP}$  (*i.e.*  
 349 more complete softer sweeps). However, the above enrichments may be influenced by locally  
 350 adaptive sweeps that create multiple linked outlier windows. We therefore pursued a  
 351 complementary analysis in which nearby outlier windows were merged into “outlier regions”,  
 352 which were then removed one at a time until the observed enrichment was erased (see  
 353 Materials and Methods). For almost every population pair, we had to remove a larger number  
 354 of regions to erase the signal of enrichment of  $F_{ST\_Window}$  than the signal of  $F_{ST\_MaxSNP}$  (Figure 6).  
 355 Hence, the greater enrichment of  $F_{ST\_Window}$  relative to  $F_{ST\_MaxSNP}$  does not appear to be a product  
 356 of broader linkage signals of  $F_{ST\_Window}$  outliers alone.

### A Chromosome X

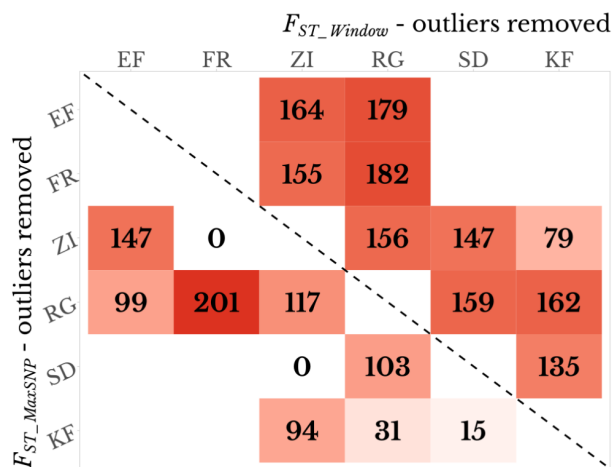

### B Autosomes

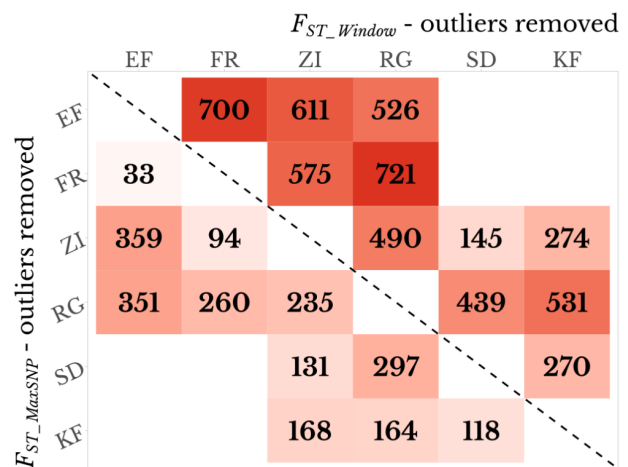

357

358 **Figure 6.** Number of outlier regions that were removed to erase the signature of enrichment for  
359 high  $F_{ST\_MaxSNP}$  (lower diagonal) and  $F_{ST\_Window}$  (upper diagonal) for each population on (A)  
360 chromosome X and (B) the combined autosome arms.  $F_{ST\_Window}$  was associated with a greater  
361 outlier region enrichment for most population pairs, reinforcing the window-level patterns  
362 shown in Figure 5. Populations: SD = South Africa. ZI = Zambia. KF = Kafue, Zambia. RG =  
363 Rwanda. EF = Ethiopia. Population pairs not present in the same demographic model were not  
364 evaluated. Color scale ranges from the minimum to maximum value within each panel.

365

### 366 **Genome Scan for Signatures of Selection**

367 We chose to complement the above multi-population analysis of genome-wide patterns with a  
368 closer analysis of a single population pair. We chose to compare the Ethiopia and Zambia town  
369 populations because (1) Their relatively large sample sizes of 129-181 and 60-76 respectively for  
370 each chromosome arm (Table S2) are more conducive to the analysis of specific  $F_{ST\_MaxSNP}$   
371 outliers, (2) These populations showed enrichments of both  $F_{ST\_MaxSNP}$  and  $F_{ST\_Window}$  (Figure 4),  
372 and (3) Past results from these populations helped motivate the present study (*e.g.* Bastide *et*  
373 *al.* 2016). We performed genome scans for regions potentially under population-specific  
374 selection between these populations using  $F_{ST\_MaxSNP}$ ,  $F_{ST\_Window}$ , and  $\chi_{MD}$ . For each statistic, we  
375 obtained a list of outlier windows (top 1%), and as above, we merged nearby outlier windows  
376 into regions (Materials and Methods). We obtained 138 outlier regions for  $F_{ST\_MaxSNP}$ , 138 for  
377  $F_{ST\_Window}$ , and 155 for  $\chi_{MD}$ . Our results showed an overlap of just 39% between the outlier  
378 regions detected with  $F_{ST\_MaxSNP}$  and  $F_{ST\_Window}$ . Perhaps surprisingly in light of the above power



379 results, there was a smaller overlap of either  $F_{ST}$  metric with  $\chi_{MD}$  (Figure 7A), although the  
 380 overlap of the haplotype statistic with  $F_{ST\_Window}$  was indeed slightly greater. In regions that  
 381 were outliers for  $F_{ST\_MaxSNP}$  but not  $F_{ST\_Window}$ , the distribution of individual SNP  $F_{ST}$  values often  
 382 had a narrow sharp  $F_{ST}$  peak, with most of the other SNPs having low  $F_{ST}$  values. On the contrary,  
 383 in regions there were outliers for  $F_{ST\_Window}$  but not  $F_{ST\_MaxSNP}$ , often no single SNP had a large  $F_{ST}$   
 384 value, but there was a broad moderate  $F_{ST}$  plateau with many SNPs showing intermediate  $F_{ST}$   
 385 values (Figure 8).

**A** Top 1% outlier regions      **B** Enriched GO terms ( $p \leq 0.01$ )

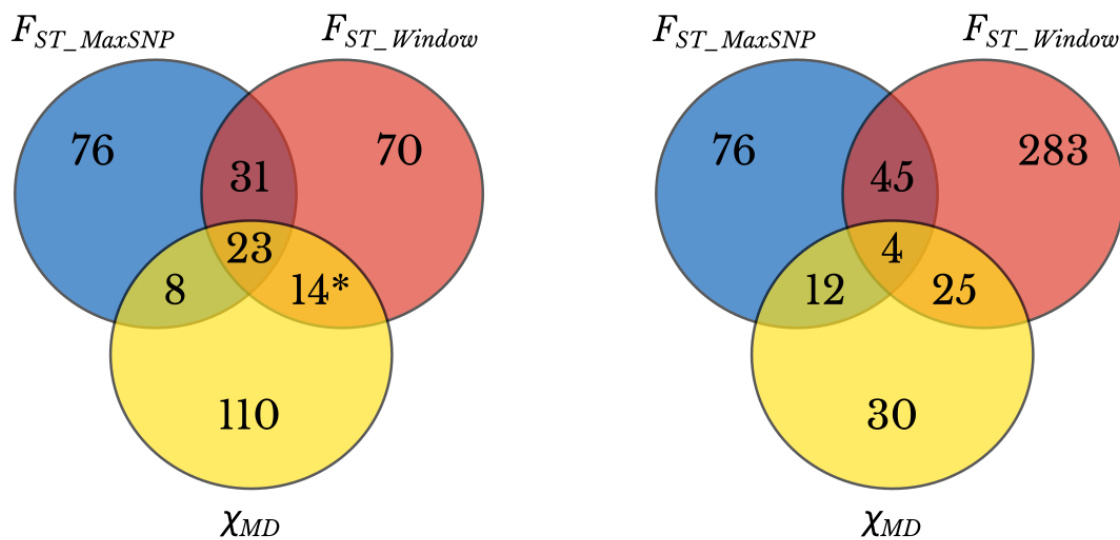

386  
 387 **Figure 7.** The three statistics detect mostly unique genomic regions and functional categories.  
 388 (A) Overlap between the top 1% outlier regions detected with  $F_{ST\_MaxSNP}$ ,  $F_{ST\_Window}$ , and  $\chi_{MD}$ . \*  
 389 indicates the average number of outlier regions between the two statistics: 15  $F_{ST\_Window}$  outlier  
 390 regions exclusively overlap  $\chi_{MD}$  outliers and 13  $\chi_{MD}$  outlier regions exclusively overlap  $F_{ST\_Window}$   
 391 outliers. (B) Overlap between enriched GO terms with raw p-value  $\leq 0.01$  based on the outlier  
 392 regions detected with  $F_{ST\_MaxSNP}$ ,  $F_{ST\_Window}$ , and  $\chi_{MD}$ .

393

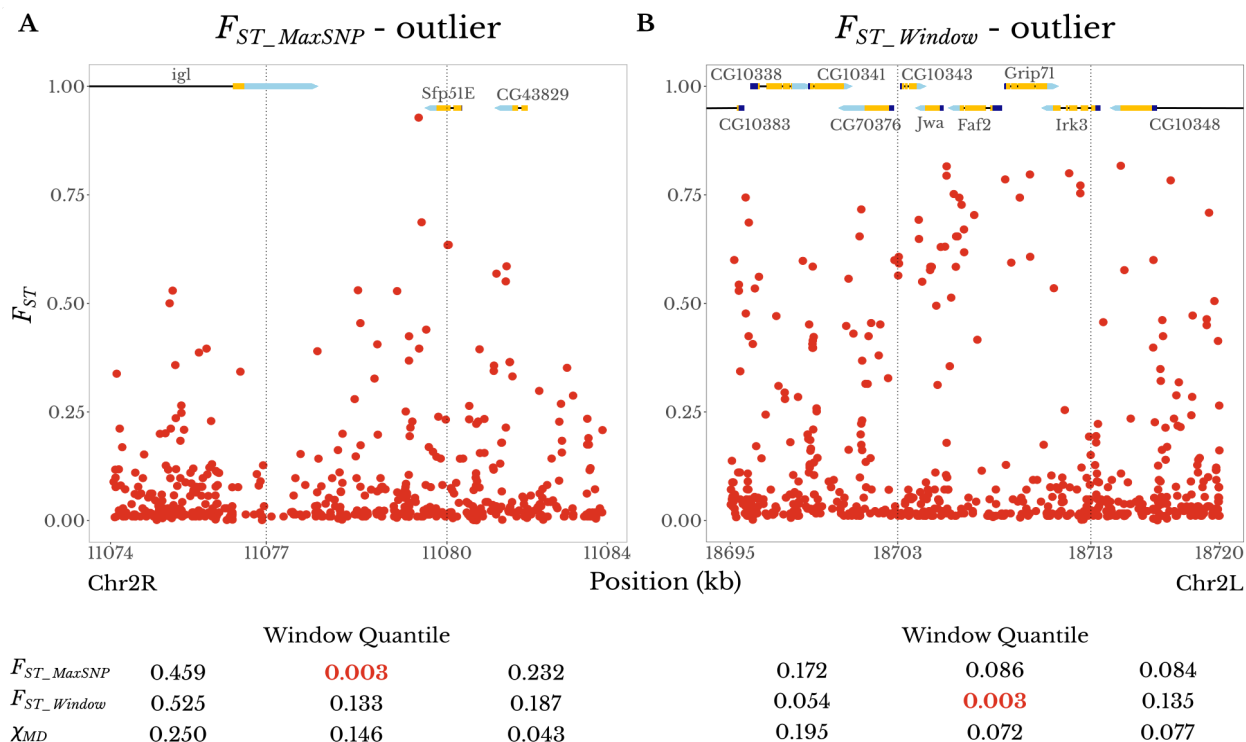

394

395 **Figure 8.** Examples of the distinct SNP-level  $F_{ST}$  landscapes associated with  $F_{ST\_MaxSNP}$  versus  
 396  $F_{ST\_Window}$  outliers. Each plot shows an outlier window for an Ethiopia-Zambia  $F_{ST}$  statistic, plus  
 397 its adjacent windows. Dashed vertical lines delimit the boundaries of the windows. Numbers  
 398 under each window are the empirical quantiles of that window's statistic ( $F_{ST\_MaxSNP}$ ,  $F_{ST\_Window}$ ,  
 399 and  $\chi_{MD}$ ) in relation to the chromosome arm-wide distribution of the same statistic, with the  
 400 outlier (quantile < 0.01) value in red. (A) An outlier window for  $F_{ST\_MaxSNP}$  (center) shows a peak-  
 401 like  $F_{ST}$  landscape with one particularly differentiated SNP. (B) An outlier window for  $F_{ST\_Window}$   
 402 (center) shows a broad plateau of fairly high  $F_{ST}$  values. Gene names and structures are shown  
 403 at the top of each plot. Protein-coding exons are in yellow, while 5' and 3' untranslated regions  
 404 are in dark blue and light blue, respectively.

405

406           We then performed GO term enrichment analysis separately for each statistic's list of  
407 outlier regions. Considering only GO terms with raw p-value < 0.01 from each list, we found  
408 mostly lower overlaps between enriched GO terms compared to the spatial overlap between  
409 outlier regions (Figure 7B; Table S3). The three statistics differed substantially in the number of  
410 enriched GO terms by this criterion: 357 for  $F_{ST\_Window}$ , 133 for  $F_{ST\_MaxSNP}$ , and 71 for  $\chi_{MD}$   
411 (although we emphasize that these terms are not independent and any given list of enriched GO  
412 terms will contain overlapping categories). The relative overlap between GO terms enriched for  
413 each statistic largely followed the relative numbers of enriched GO terms for each (Figure 7B).  
414 Mirroring the outlier region results, most enriched GO terms were detected for only one of the  
415 three statistics, consistent with their complementary detection powers described above.

416

## 417 **Discussion**

### 418 **$F_{ST\_MaxSNP}$ complements other statistics by detecting soft sweeps**

419 Identifying regions under selection can help us answer further questions about the evolution of  
420 local adaptation, such as which biological functions are under selective pressure, the number of  
421 loci underlying adaptive events, the source of the adaptive variation, and the kinds of genetic  
422 changes that might be under selection. Our results underscore the importance of deploying  
423 methods capable of capturing different kinds of selective sweeps when the aim of the study is to  
424 identify as many genes potentially under local adaptation as possible.

425  $F_{ST\_MaxSNP}$  in particular, seems to be especially useful to detect soft sweeps with relatively  
426 large initial and final frequencies of the beneficial allele. Instances of mostly complete soft  
427 sweeps, as simulated here, represent regions in which a beneficial allele was present in several  
428 different haplotypes that might have increased in frequency along with the beneficial allele.  
429 While the selected SNP itself changed in frequency drastically, resulting in a large  $F_{ST\_MaxSNP}$ , the  
430 alleles around it must have changed in frequency to a lesser degree because many background  
431 haplotypes were hitchhiking along with the beneficial allele. Therefore, while the beneficial  
432 variant can have an extreme  $F_{ST}$  value, the lower allele frequency changes in the other SNPs in  
433 that window would result in a  $F_{ST\_Window}$  that is not statistically significant, and thus a low power  
434 to detect a selective sweep under these conditions.

435 The window-wide metrics,  $F_{ST\_Window}$  and  $\chi_{MD}$ , had greater power than  $F_{ST\_MaxSNP}$  to detect  
436 relatively harder, partial sweeps that had intermediate final allele frequencies. In these sweeps,  
437 no individual SNP changed dramatically in frequency, so none have  $F_{ST}$  values higher than what  
438 could be obtained randomly in the genome. However, the increase in frequency of one or a few  
439 haplotypes resulted in many SNPs in the same region with intermediate  $F_{ST}$ , producing a  
440 window-wide pattern that is too extreme to be generated by chance - even if each single marker  
441 individually did not have an extreme  $F_{ST}$  value.

442 There was little difference in the power of  $F_{ST\_MaxSNP}$  and  $F_{ST\_Window}$  to detect regions  
443 under selection in scenarios with varying migration rates. We had expected that  $F_{ST\_MaxSNP}$   
444 would outperform  $F_{ST\_Window}$  in scenarios with older splits, as selection might only maintain a  
445 narrow window of differentiation between the two populations in the presence of long-term

446 recombination with migrant haplotypes. Nonetheless, differences in split time between the two  
447 populations only had a small effect in a very narrow space of parameters (intermediate  
448 migration rates for high  $N_e$  populations, Figure S1), suggesting that even in scenarios with recent  
449 divergence, the populations had already reached a state of equilibrium and the balance  
450 between migration, selection, and recombination did not result in distinguishable signatures of  
451 selection between  $F_{ST\_MaxSNP}$  and  $F_{ST\_Window}$ . However, both metrics outperformed  $\chi_{MD}$  on the  
452 simulated scenarios, indicating that selection could not maintain long shared haplotypes in the  
453 presence of migration.

454 In light of the complementary performance of  $F_{ST\_MaxSNP}$  and  $F_{ST\_Window}$  for the non-  
455 migration cases, we tested whether  $F_{ST\_Window}$  across shorter windows could yield a balance of  
456 reasonable power to detect both complete soft sweeps and partial hard sweeps. However, the  
457 relationship between window size and the power - while accounting for the increase in the  
458 number of tests in smaller windows - did not follow this prediction. Our results suggest that  
459 applying both  $F_{ST\_MaxSNP}$  and  $F_{ST\_Window}$  to conventionally-sized windows is preferable to shrinking  
460 the window size in an effort to identify narrower soft sweeps. More generally, we suggest that  
461 genetic differentiation on both SNP and broader scales should be incorporated into scans for  
462 local adaptation, whether using the specific summary statistics described here, or attempting to  
463 develop a single statistic or integrated analysis framework that encompasses the advantages of  
464 both.

465 In this study, we have used neutral demographic simulations to estimate statistical  
466 power at the single window level, only penalizing multiple tests when comparing between

467 window sizes. Clearly, our results do not imply the power to identify genome-wide significant  
468 loci, which is only rarely attainable for population genomic scans. Instead, most genome scans  
469 aim to identify good candidates for downstream study, and our results are best interpreted in  
470 terms of the relative utility of these summary statistics to identify local adaptation candidates.

471 An important caveat of using  $F_{ST\_MaxSNP}$  is that it requires a greater sample size than  
472  $F_{ST\_Window}$ . With smaller samples, it is easy to get a large  $F_{ST\_MaxSNP}$  at one of the many analyzed  
473 SNPs through sampling variance alone, whereas an extreme  $F_{ST\_Window}$  value is less likely in this  
474 scenario. It is difficult to provide any universal advice regarding sample size, because the  
475 neutral variance of  $F_{ST\_MaxSNP}$  also depends strongly on demographic history, as shown above.  
476 Nonetheless, we have shown that in two scenarios in which  $F_{ST\_MaxSNP}$  outperformed  $F_{ST\_Window}$  its  
477 power declined considerably when we decreased the sample size from 50 to 20 chromosomes.  
478 Although the relationship between sample size and power will depend on the specific  
479 populations being studied, the utility of  $F_{ST\_MaxSNP}$  seems most promising when sample sizes are  
480 around 100 alleles per population or more. However, it would be advisable to conduct neutral  
481 simulations based on estimated or suspected demography, in order to identify sample sizes for  
482 which it is very unlikely to get extreme SNP  $F_{ST}$  values in the absence of local adaptation.

483

#### 484 **Both $F_{ST\_Window}$ and $F_{ST\_MaxSNP}$ outliers are enriched among *Drosophila* populations**

485 When we applied  $F_{ST\_Window}$  and  $F_{ST\_MaxSNP}$  to empirical data from *D. melanogaster* populations,  
486 we found that enrichment patterns of  $F_{ST\_Window}$  and  $F_{ST\_MaxSNP}$  varied among population pairs,  
487 both for high and low  $F_{ST}$  values. The excess of windows with high  $F_{ST}$  observed could be

488 explained by local adaptation: unique selective sweeps in one population increase the  
489 differentiation between two populations in that region. Not all population pairs showed the  
490 same degree of enrichment for high  $F_{ST}$ . A larger enrichment could be due to a higher number  
491 of selective sweeps between two populations, stronger selective events that impacted a larger  
492 region of the genome, or a neutral history more conducive to outlier detection. The populations  
493 we studied cover a large geographical scale, most are located in sub-Saharan Africa and one in  
494 Europe. These populations are exposed to a variety of environments, ranging from warm  
495 tropical lowlands to cool high latitude and high altitude regions, in addition to commensal  
496 versus wilderness settings (Sprenghelmeyer *et al.* 2020). Hence, they are most likely exposed to  
497 several unique selective pressures that could be underlying local adaptation and an enrichment  
498 of high  $F_{ST}$  values.

499         Alternatively, enrichment for high  $F_{ST}$  could also be explained by background selection,  
500 which is expected to reduce genetic diversity and therefore result in lower effective population  
501 sizes in that genomic region. Genetic drift is stronger in regions of low  $N_e$ , which could increase  
502 the differentiation between two populations and produce high  $F_{ST}$  (Charlesworth *et al.* 1993).  
503 However, a simulation study of background selection targeting stickleback exons found no  
504 evidence for background selection increasing  $F_{ST}$  outliers (Matthey-Doret and Whitlock 2019).

505         On the other extreme, the existence of enrichment for low values of  $F_{ST}$  suggests that  
506 many regions of the genome maintained unexpectedly similar allele frequencies between two  
507 populations. Following a population split, neutral evolutionary forces such as genetic drift are  
508 expected to increase the genetic differences between two populations. The fact that many

509 regions seemed to have changed less than what was expected due to neutral forces could also  
510 be explained by the action of natural selection. This could be the product of shared selective  
511 sweeps (i.e. similar selective pressures) taking place in both populations, instead of local  
512 adaptation. Shared balancing selection could also be acting at some loci to maintain allele  
513 frequencies constant between two populations, perhaps even from before their split time.

514         We should also acknowledge that the demographic models applied here are simply the  
515 best available estimates of population history, and no demographic model fully accounts for the  
516 complexity of natural populations. Demographic model misspecification could result in some  
517 enrichment of high and/or low  $F_{ST}$  values. One potential source of error in demographic  
518 estimation is natural selection. The demographic models were estimated based on tentatively  
519 neutral regions of the genome (Sprengelmeyer *et al.* 2020). However, these regions could be  
520 under the influence of linked positive and negative selection, with the potential to bias  
521 demographic estimation. For example, if the presumed neutral data was substantially affected  
522 by either local adaptation or shared sweeps, it could bias the neutral distribution of  $F_{ST}$  towards  
523 higher or lower values, respectively, making it more difficult to detect  $F_{ST}$  outliers in that  
524 direction. Nonetheless, previous work suggests that this effect might be weak on demographic  
525 inference in *D. melanogaster* (Lange and Pool 2018).

526         In nearly all population pairs,  $F_{ST\_Window}$  showed a larger enrichment than  $F_{ST\_MaxSNP}$ . The  
527 greater enrichment of  $F_{ST\_Window}$  persisted when we instead pursued an outlier region removal  
528 strategy. In light of the complementary zones of power shown in Figure 1, these results suggest  
529 that roughly speaking, there might be a larger contribution of partial hard sweeps than complete



530 soft sweeps to local adaptation among these populations. Furthermore, the fairly low levels of  
531 outlier overlap between  $F_{ST\_Window}$  and  $F_{ST\_MaxSNP}$  may suggest that the sweeps both statistics can  
532 reliably detect (*i.e.* more complete harder sweeps) are not the primary drivers of local  
533 adaptation in this data set. Overall, these results suggest that partial sweeps might have played  
534 a large role in the adaptation of fly populations to diverse environments. The importance of  
535 partial sweeps in populations of *D. melanogaster* has been proposed previously, including for  
536 some of the populations studied here (Pool and Aquadro 2007; Bastide *et al.* 2016; Garud and  
537 Petrov 2016; Vy *et al.* 2017).

538 Here, we have shown that SNP-level  $F_{ST}$  ( $F_{ST\_MaxSNP}$ ) offers strong power to detect soft  
539 sweeps, and is highly complementary to window-wide frequency and haplotype statistics for  
540 detecting local adaptation. These results stress the importance of taking into account the  
541 different signatures left by different kinds of selective sweeps in the genome when deciding  
542 how to perform a genome scan. The raw summary statistics evaluated here can either be  
543 applied in parallel, or their signals can be integrated into frameworks such as approximate  
544 Bayesian computation and machine learning. Thus far, the latter methodologies have been  
545 used more extensively to detect and classify selective sweeps within a single population (Peter  
546 *et al.* 2012; Sheehan and Song 2016; Schrider and Kern 2016, 2017). However, such approaches  
547 are equally applicable to the study of local adaptation (Key *et al.* 2014). Future work could  
548 investigate whether methods that combine multiple statistics would benefit from including  
549  $F_{ST\_MaxSNP}$ , potentially increasing their power to detect soft sweeps and their accuracy in  
550 classifying different types of sweeps. Because studies of genetic differentiation between

551 populations inherently control for evolutionary variance in the shared ancestral population,  
552 local adaptation may offer a better “signal to noise ratio” regarding the types of positive  
553 selection acting in natural populations, compared to single population studies. Hence, our  
554 results may contribute toward not only an improved ability to detect local adaptation, but also a  
555 clearer understanding of adaptation in nature more generally.

556

## 557 **Methods**

### 558 **Simulation Power Analysis**

559 To generate adaptive and neutral distributions of genetic diversity, we performed simulations of  
560 demographic history scenarios with and without natural selection using *msms* (Ewing and  
561 Hermisson 2010). For each model, we obtained 10,000 replicates from which we calculated the  
562 statistics of interest. Power was calculated as the proportion of replicates under selection with  
563 a statistical value larger than 95% of the values obtained in its corresponding replicates without  
564 selection. We investigated the power of three different statistics:  $F_{ST\_MaxSNP}$ ,  $F_{ST\_Window}$  and  $\chi_{MD}$   
565 (Lange and Pool 2016), which were calculated on windows of fixed size.  $F_{ST\_MaxSNP}$  is based on  
566 the SNP within a window with the highest  $F_{ST}$  value.  $F_{ST\_Window}$  was calculated as the weighted  
567 average of all SNPs in a window (Reynolds *et al.* 1983).  $\chi_{MD}$  stands for Comparative Haplotype  
568 Identity; it compares the average length of identical haplotypes in a window between two  
569 populations, and was calculated following Lange and Pool (2016). The window size used was  
570 5,000 bp for simulations of populations with high effective population size ( $N_e$ ) and 100,000 bp  
571 for simulations of populations with low  $N_e$ . Except where otherwise stated, the sample size was

572 50 chromosomes. The high  $N_e$  simulations used parameters similar to those from flies  
573 (*Drosophila melanogaster*) while the low  $N_e$  had parameters similar to humans (simulation  
574 parameters followed Lange and Pool, 2016).

575 We initially used scenarios of constant population size and a simple population split to  
576 simulate scenarios of selective sweeps with varying initial and final allele frequencies,  
577 representing hard and soft sweeps as well as complete and partial sweeps. We also simulated  
578 scenarios of population bottlenecks and population splits for complete selective sweeps, and for  
579 scenarios with varying migration rates for hard sweeps (not constrained by ending allele  
580 frequency). For bottlenecks, the population that will experience local adaptation underwent a  
581 period of reduced population size for the first 0.01 coalescent units after the population split  
582 (which in most scenarios including these, occurred 0.05 coalescent units ago; Table S1).

583 The simulations of populations with high  $N_e$  were done for two different selection  
584 coefficients ( $s = 0.01$  and  $s = 0.001$ ) and simulations of populations with low  $N_e$  only included  $s =$   
585  $0.01$  (Table S1). Simulations of complete sweeps only used replicates in which the beneficial  
586 allele went to fixation. Simulations of partial sweeps only accepted replicates in which the  
587 beneficial allele stayed within 4% of the targeted ending frequency. Selection initiation time  
588 was adjusted in each case to maximize the proportion of accepted replicates. Moreover, in the  
589 scenarios with initial allele frequencies larger than  $1/2N_e$ , both the selected and non-selected  
590 populations had the same initial frequency.

591 For models that included migration (gene flow), selection of equal magnitudes but in  
592 opposite directions was imposed on each population. Per generation migration rates varied

593 from 0.0004 to 0.004 in simulations with high  $N_e$  populations and from 0.01 to 0.10 in  
594 simulations with low  $N_e$  populations. For each migration rate, split times varied from 0.1 to 1  
595 coalescent unit.

596 We calculated the effect of sample size on the power of each statistic in six different  
597 scenarios: four models with demographic history of a simple isolation between two populations  
598 and two models with population size bottleneck. Of the simple isolation models, two models for  
599 high  $N_e$  populations were considered: one in which  $F_{ST\_Window}$  outperformed  $F_{ST\_MaxSNP}$  (initial  
600 allele frequency of  $1/2N_e$  and final allele frequency of 0.4) and another where  $F_{ST\_MaxSNP}$   
601 outperformed  $F_{ST\_Window}$  (initial frequency of 0.005 and final frequency of 0.7). Two scenarios for  
602 low  $N_e$  populations were also considered: one in which  $F_{ST\_Window}$  outperformed  $F_{ST\_MaxSNP}$  (initial  
603 allele frequency of  $1/2N_e$  and final allele frequency of 0.5) and another where  $F_{ST\_MaxSNP}$   
604 outperformed  $F_{ST\_Window}$  (initial frequency of 0.05 and final frequency of 0.8). For the bottleneck  
605 models, we used models with a bottleneck of 5% (*i.e.* a reduction to 5% of the prior  $N_e$  for 0.01  
606 coalescent units in the adapting population immediately following the population split) and only  
607 models in which  $F_{ST\_MaxSNP}$  outperformed the window wide statistics were considered: one  
608 model for high  $N_e$  population (initial allele frequency from 0.5% to 100%) and one for low  $N_e$   
609 populations (initial allele frequency from 1% to 100%). For all the six scenarios, we used sample  
610 sizes of 10, 20, 50 (original sample size), 100, and 200 chromosomes.

611 We calculated the effect of window sizes on the power of each statistic in four different  
612 scenarios, the same scenarios of simple isolation used to calculate the power of sample sizes  
613 above. For the high  $N_e$  scenarios, we used window sizes of 5 kb (original size), 2 kb, 1 kb, 0.5 kb,

614 0.2 kb, and 0.1 kb. For the low  $N_e$  scenarios, we used window sizes of 100 kb (original size), 50  
615 kb, 20 kb, 10 kb, 5 kb, and 1 kb. To calculate  $\chi_{MD}$ , we used a minimum haplotype threshold of  
616 10% of the window size (as was used for the original analyses). For each window size smaller  
617 than the original, we applied a p-value Bonferroni multiple testing correction proportional to the  
618 reduction in size (or equivalently, the increased number of windows needed to cover a given  
619 genomic region) to calculate power. That is, while for the standard window size power is the  
620 number of replicates with a p-value of 0.05 or lower, for a window half the size of the original  
621 the p-value would need to be 0.025 or lower.

622

### 623 **Empirical Enrichment of $F_{ST\_MaxSNP}$ and $F_{ST\_Window}$ - data and simulations**

624 Our data set consists of individual fly strain genomes from six natural populations of *D.*  
625 *melanogaster*: one non-human commensal population from Kafue, Zambia (KF) and five human  
626 commensal populations from different countries: Zambia (ZI), South Africa (SD), Rwanda (RG),  
627 Ethiopia (EF) and France (FR), using data from Lack *et al.* (2016) and Sprengelmeyer *et al.* (2020).  
628 From each population, for each chromosome arm (ChrX, Chr2L, Chr2R, Chr3L, Chr3R), we  
629 excluded genomes from lines with a known inversion for that arm. To boost the sample size of  
630 two populations with genomes from partially inbred lines (Ethiopia and France), instead of only  
631 using homozygous regions of the genome (as in the original filtering of the published data set)  
632 we also included heterozygous regions identified by Lack *et al.* (2016), and therefore counted  
633 two alleles at each site from these regions. For any pair of lines with excess identity by descent  
634 (IBD) between them (defined as more than 10 megabases of IBD outside previously defined

635 regions of low recombination; Lack *et al.*, 2016), we excluded one member of the pair from this  
636 data set. For each population sample and each chromosome arm, we chose a sample size to  
637 jointly maximize the number of analyzable sites and the sample size itself. Our resulting sample  
638 sizes are shown on Table S2. For sites with more than that number of alleles called, we  
639 downsampled to match the chosen sample size.

640 We calculated pairwise  $F_{ST\_Window}$  and  $F_{ST\_MaxSNP}$  for all populations using diversity-scaled  
641 window sizes designed to contain 250 non-singleton SNPs in the ZI sample. To compare  
642 empirical and null distributions for similar recombination rates, each window was assigned to  
643 one of five recombination rates bins based on estimates from Comeron *et al.* (2012); the bins  
644 corresponded to recombination rates from 0.5-1, 1-1.5, 1.5-2, 2-3, and greater than 3. Windows  
645 with recombination rates lower than 0.5 were not used due to low spatial resolution for  
646 localizing signatures of selection in low recombination regions. We obtained p-values for each  
647 window using neutral demographic simulations performed using *ms* (Hudson 2002).  
648 Demographic simulations were performed using parameters estimated for the evolutionary  
649 history of nine populations of *D. melanogaster*, including all the populations we analyzed  
650 (Sprenkelmeyer *et al.* 2020). The other three populations were lowland Ethiopia (EA),  
651 Cameroon (CO), and Egypt (EG). We did not use those three populations in our empirical  
652 analyses due to their lower sample sizes. Nonetheless, they were included in the simulations in  
653 order to accurately reflect the estimated patterns of migration.

654 Each demographic model had been estimated based on tentatively neutral genetic  
655 markers (short introns and 4-fold synonymous sites from regions with sex-averaged

656 recombination rates of at least 1 cM/Mb) from inversion-free chromosome arms  
657 (Sprenkelmeyer *et al.* 2020). A model was estimated for each of three chromosome arms that  
658 had lower inversion frequencies (X, 2R, and 3L), and the history was inferred iteratively, such  
659 that not all population samples were present in the same model. To better approximate genetic  
660 diversity in all populations, we used two sets of demographic models: Northern model  
661 (containing ZI, RG, CO, EF, FR, EG, EA) and Southern model (containing ZI, RG, CO, SD, and KF).  
662 The Northern model for the chromosome X was subdivided into two sub-models (one with ZI,  
663 RG, CO, EF, EA and another with ZI, RG, CO, FR, EG). Hence, we simulated four Northern models  
664 and three Southern models (command lines in Table S2). The models for the autosomal  
665 chromosome arms (2R and 3L) were simulated using the highest sample sizes for any autosomal  
666 arm of each population (Table S2). Simulated sample sizes were downsampled to match the  
667 sample sizes of each specific arm when comparing empirical and simulated  $F_{ST}$  patterns for any  
668 given arm. The window size and crossing over rate used in each replicate were based on a  
669 random sampling with replacement from the empirical windows, and the single gene conversion  
670 rate and mean tract length were based on the estimates of Comeron *et al.* (2012). Therefore, a  
671 null distribution was generated for each model and each recombination bin (described above).  
672 For each model and each recombination bin, 50,000 replicates were simulated.

673

#### 674 **Enrichment calculation**

675  $F_{ST\_Window}$  and  $F_{ST\_MaxSNP}$  were calculated for each population pair and each chromosome arm.  $F_{ST}$   
676 was calculated for the simulated data using the same sample sizes as the empirical data (Table

677 S2). For sites with more than two alleles, only the two most common alleles were kept. Sites  
678 with minor allele counts lower than two were discarded from empirical and simulated analyses.

679 P-values were calculated for each window based on the neutral distribution of its  
680 corresponding recombination group. Windows from chromosome X were compared to neutral  
681 distributions based on the model for chromosome X. For autosomal loci, we determined that  
682 simulations from the 3L model yielded somewhat milder outlier enrichments than the 2R model,  
683 and therefore we conservatively focused on results from the 3L model.

684 We calculated p-value enrichments for  $F_{ST\_Window}$  and  $F_{ST\_MaxSNP}$  using p-value bins of  
685 width equal to 0.05, resulting in 20 bins of p-value 0 to 1. We counted how many windows had  
686 a given p-value for each bin and divided the observed number by how many windows we  
687 expected to have with a p-value in that bin based on simulated data.

688 Neighboring windows with low p-value could be showing the effect of a single selective sweep.  
689 Therefore, we complemented this outlier window enrichment analysis with one based on  
690 “outlier regions”. We intentionally defined outlier regions generously, preferring to falsely lump  
691 two sweeps versus splitting a single sweep into two or more regions. Formally, starting with the  
692 window containing the lowest p-values, we extended the region surrounding it until we reached  
693 a stretch of five consecutive windows with  $p > 0.1$  to create an outlier region. We removed the  
694 outlier regions from our analysis and repeated the process until the signal of enrichment was  
695 erased (defined as the  $p < 0.05$  bin having no more enrichment than the  $0.05 < p < 0.1$  bin). For  
696 each of  $F_{ST\_MaxSNP}$  and  $F_{ST\_Window}$ , we recorded the total number of outlier regions that had to be  
697 removed for a given population pair.



698

699 **Genome scan for regions under selection - Ethiopia vs. Zambia**

700 We performed a genome scan for candidate regions under selection between the Ethiopia (EF)  
701 and Zambia (ZI) populations. We calculated  $F_{ST\_Window}$ ,  $F_{ST\_MaxSNP}$ , and  $\chi_{MD}$  for each window of the  
702 genome. We used an outlier approach and considered windows in the top 1% of each statistic  
703 to be the candidate regions under selection. Here, we combined multiple outlier windows into  
704 the same outlier region if they were separated by no more than five windows with p-value >  
705 0.01. To investigate whether the candidate regions detected with each statistic were the same  
706 or unique, we calculated how many regions overlapped between the different statistics. We  
707 considered that two regions were overlapping if at least 50% of the smaller region overlapped  
708 the larger one.

709 For each list of candidate regions under selection, we performed a GO term enrichment  
710 analysis using a method initially described by Pool *et al.* 2012. For each gene within a candidate  
711 region, we obtained GO term annotations from FlyBase. The GO terms for each gene also  
712 included all the parents of each term. GO terms that appeared repeatedly in a candidate region  
713 were counted only once for that region. We calculated the p-values for each GO term based on  
714 10,000 permutations of the genomic locations of the outlier regions. This procedure allows  
715 genes to have different null probabilities of being outliers, particularly based on their length.  
716 We obtained a list of enriched GO terms for each statistic defined as the GO terms with raw p-  
717 values less than or equal to 0.01. We then determined the overlap between the three lists of  
718 enriched GO terms.

719

## 720 **Data Availability Statement**

721 No new empirical data were generated for this research. Scripts used in the analyses presented  
722 can be found at [https://github.com/ribeirots/fst\\_maxsnp.git](https://github.com/ribeirots/fst_maxsnp.git).

723

## 724 **Acknowledgments**

725 We appreciate comments from multiple Pool lab members on this manuscript. This research  
726 was funded by NIH grants R01 GM127480 and R35 GM13630, and by NSF grant DEB 1754745.

727

## 728 **References**

- 729 Aitken SN, Whitlock MC. 2013. Assisted gene flow to facilitate local adaptation to climate  
730 change. *Annu Rev Ecol Evol Syst*. 44(1):367–388. doi:10.1146/annurev-ecolsys-110512-135747.
- 731 Bamshad M, Wooding SP. 2003. Signatures of natural selection in the human genome. *Nat Rev*  
732 *Genet*. 4(2):99–110. doi:10.1038/nrg999.
- 733 Bastide H, Lange JD, Lack JB, Yassin A, Pool JE. 2016. A variable genetic architecture of melanic  
734 evolution in *Drosophila melanogaster*. *Genetics*. 204(3):1307–1319.  
735 doi:10.1534/genetics.116.192492.
- 736 Catania F, *et al.* 2004. World-wide survey of an *Accord* insertion and its association with DDT  
737 resistance in *Drosophila melanogaster*. *Mol Ecol*. 13(8):2491–2504. doi:10.1111/j.1365-  
738 294X.2004.02263.x.
- 739 Charlesworth B, Morgan MT, Charlesworth D. 1993. The effect of deleterious mutations on

- 740 neutral molecular variation. *Genetics*. 134(4):1289–1303.
- 741 Comeron JM, Ratnappan R, Bailin S. 2012. The many landscapes of recombination in *Drosophila*  
742 *melanogaster*. *PLoS Genet*. 8(10):e1002905. doi:10.1371/journal.pgen.1002905.
- 743 Ewing G, Hermisson J. 2010. MSMS: a coalescent simulation program including recombination,  
744 demographic structure and selection at a single locus. *Bioinformatics*. 26(16):2064–2065.  
745 doi:10.1093/bioinformatics/btq322.
- 746 Fitzpatrick MC, Keller SR. 2015. Ecological genomics meets community-level modelling of  
747 biodiversity: mapping the genomic landscape of current and future environmental adaptation.  
748 *Ecol Lett*. 18(1):1–16. doi:10.1111/ele.12376.
- 749 Funk WC, McKay JK, Hohenlohe PA, Allendorf FW. 2012. Harnessing genomics for delineating  
750 conservation units. *Trends Ecol Evol*. 27(9):489–496. doi:10.1016/j.tree.2012.05.012.
- 751 Garud NR, Petrov DA. 2016. Elevated linkage disequilibrium and signatures of soft sweeps are  
752 common in *Drosophila melanogaster*. *Genetics*. 203(2):863–880.  
753 doi:10.1534/genetics.115.184002.
- 754 Hermisson J, Pennings PS. 2005. Soft sweeps: molecular population genetics of adaptation from  
755 standing genetic variation. *Genetics*. 169(4):2335–2352. doi:10.1534/genetics.104.036947.
- 756 Hudson RR. 2002. Generating samples under a Wright–Fisher neutral model of genetic variation.  
757 *Bioinformatics*. 18(2):337–338. doi:10.1093/bioinformatics/18.2.337.
- 758 Jensen JD. 2014. On the unfounded enthusiasm for soft selective sweeps. *Nat Commun*.  
759 5(1):5281. doi:10.1038/ncomms6281.
- 760 Kaplan NL, Hudson RR, Langley CH. 1989. The “hitchhiking effect” revisited. *Genetics*. 123(4):

- 761 887–899. doi:10.1093/genetics/123.4.887.
- 762 Kawecki TJ, Ebert D. 2004. Conceptual issues in local adaptation. *Ecol Lett.* 7(12):1225–1241.
- 763 doi:10.1111/j.1461-0248.2004.00684.x.
- 764 Key FM, *et al.* 2014. Selection on a variant associated with improved viral clearance drives local,
- 765 adaptive pseudogenization of interferon lambda 4 (IFNL4). *PLoS Genet.* 10(10):e1004681.
- 766 doi:10.1371/journal.pgen.1004681.
- 767 Lack JB, *et al.* 2015. The *Drosophila* Genome Nexus: a population genomic resource of 623
- 768 *Drosophila melanogaster* genomes, including 197 from a single ancestral range population.
- 769 *Genetics.* 199(4):1229–1241. doi:10.1534/genetics.115.174664.
- 770 Lack JB, Lange JD, Tang AD, Corbett-Detig RB, Pool JE. 2016. A thousand fly genomes: an
- 771 expanded *Drosophila* Genome Nexus. *Mol Biol Evol.* 33:3308–3313.
- 772 doi:10.1093/molbev/msw195.
- 773 Lange JD, Pool JE. 2016. A haplotype method detects diverse scenarios of local adaptation from
- 774 genomic sequence variation. *Mol Ecol.* 25(13):3081–3100. doi:10.1111/mec.13671.
- 775 Lange JD, Pool JE. 2018. Impacts of recurrent hitchhiking on divergence and demographic
- 776 inference in *Drosophila*. *Genome Biol Evol.* 10(8):1882–1891. doi:10.1093/gbe/evy142.
- 777 Lewontin RC, Krakauer J. 1973. Distribution of gene frequency as a test of the theory of the
- 778 selective neutrality of polymorphisms. *Genetics.* 74(1):175–195. doi:10.1093/genetics/74.1.175.
- 779 Matthey-Doret R, Whitlock MC. 2019. Background selection and  $F_{ST}$ : consequences for detecting
- 780 local adaptation. *Mol Ecol.* 28(17):3902–3914. doi:10.1111/mec.15197.
- 781 Maynard Smith J, Haigh J. 1974. The hitch-hiking effect of a favourable gene. *Genet Res.*

- 782 23(01):23–35. doi:10.1017/S0016672300014634.
- 783 Pennings PS, Hermisson J. 2006a. Soft sweeps II—molecular population genetics of adaptation  
784 from recurrent mutation or migration. *Mol Biol Evol.* 23(5):1076–1084.  
785 doi:10.1093/molbev/msj117.
- 786 Pennings PS, Hermisson J. 2006b. Soft sweeps III: the signature of positive selection from  
787 recurrent mutation. *PLoS Genet.* 2(12):e186. doi:10.1371/journal.pgen.0020186.
- 788 Peter BM, Huerta-Sanchez E, Nielsen R. 2012. Distinguishing between selective sweeps from  
789 standing variation and from a de novo mutation. *PLoS Genet.* 8(10):e1003011.  
790 doi:10.1371/journal.pgen.1003011.
- 791 Pool JE, *et al.* 2012. Population genomics of sub-Saharan *Drosophila melanogaster*: African  
792 diversity and non-African admixture. *PLoS Genet.* 8:e1003080.  
793 doi:10.1371/journal.pgen.1003080.
- 794 Pool JE, Aquadro CF. 2007. The genetic basis of adaptive pigmentation variation in *Drosophila*  
795 *melanogaster*. *Mol Ecol.* 16(14):2844–2851. doi:10.1111/j.1365-294X.2007.03324.x.
- 796 Pool JE, Braun DT, Lack JB. 2017. Parallel evolution of cold tolerance within *Drosophila*  
797 *melanogaster*. *Mol Biol Evol.* 34(2):349–360. doi:10.1093/molbev/msw232.
- 798 Rebeiz M, Pool JE, Kassner VA, Aquadro CF, Carroll SB. 2009. Stepwise modification of a modular  
799 enhancer underlies adaptation in a *Drosophila* population. *Science.* 326(5960):1663–1667.  
800 doi:10.1126/science.1178357.
- 801 Reynolds J, Weir BS, Cockerham CC. 1983. Estimation of the coancestry coefficient: basis for a  
802 short-term genetic distance. *Genetics.* 105(3):767–779. doi:10.1093/genetics/105.3.767.

803 Ross-Ibarra J, Morrell PL, Gaut BS. 2007. Plant domestication, a unique opportunity to identify  
804 the genetic basis of adaptation. *Proc Nat Acad Sci.* 104(Suppl 1):8641–8648.  
805 doi:10.1073/pnas.0700643104.

806 Schlenke TA, Begun DJ. 2004. Strong selective sweep associated with a transposon insertion in  
807 *Drosophila simulans*. *Proc Nat Acad Sci.* 101(6):1626–1631. doi:10.1073/pnas.0303793101.

808 Schrider DR, Kern AD. 2016. S/HIC: Robust identification of soft and hard sweeps using machine  
809 learning. *PLoS Genet.* 12(3):e1005928. doi:10.1371/journal.pgen.1005928.

810 Schrider DR, Kern AD. 2017. Soft sweeps are the dominant mode of adaptation in the human  
811 genome. *Mol Biol Evol.* 34(8):1863–1877. doi:10.1093/molbev/msx154.

812 Sheehan S, Song YS. 2016. Deep learning for population genetic inference. *PLoS Comput Biol.*  
813 12(3):e1004845. doi:10.1371/journal.pcbi.1004845.

814 Sprengelmeyer QD, *et al.* 2020. Recurrent collection of *Drosophila melanogaster* from wild  
815 African environments and genomic insights into species history. *Mol Biol Evol.* 37(3):627–638.  
816 doi:10.1093/molbev/msz271.

817 Tigano A, Friesen VL. 2016. Genomics of local adaptation with gene flow. *Mol Ecol.* 25(10):2144–  
818 2164. doi:10.1111/mec.13606.

819 Vy HMT, Won YJ, Kim Y. 2017. Multiple modes of positive selection shaping the patterns of  
820 incomplete selective sweeps over African populations of *Drosophila melanogaster*. *Mol Biol*  
821 *Evol.* 34(11):2792–2807. doi:10.1093/molbev/msx207.

822 Weir BS, Cardon LR, Anderson AD, Nielsen DM, Hill WG. 2005. Measures of human population  
823 structure show heterogeneity among genomic regions. *Genome Res.* 15(11):1468–1476.

824 doi:10.1101/gr.4398405.

825 Yeaman S. 2015. Local adaptation by alleles of small effect. *Am Nat.* 186(S1):S74–S89.

826 doi:10.1086/682405.
